# Supplementary material for: High-temperature resistive gas sensors based on ZnO/SiC nanocomposites
Source: publisher site journal article supplement (doi:10.3762/bjnano.10.151), 2019-07-26
Supplement: Additional file 1 [file 2190-4286-10-151-S1.pdf]

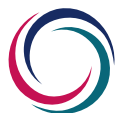

## Supporting Information

for

### High-temperature resistive gas sensors based on ZnO/SiC nanocomposites

Vadim B. Platonov, Marina N. Rumyantseva, Alexander S. Frolov, Alexey D. Yapryntsev and Alexander M. Gaskov

*Beilstein J. Nanotechnol.* **2019**, *10*, 1537–1547. doi:10.3762/bjnano.10.151

### XPS data

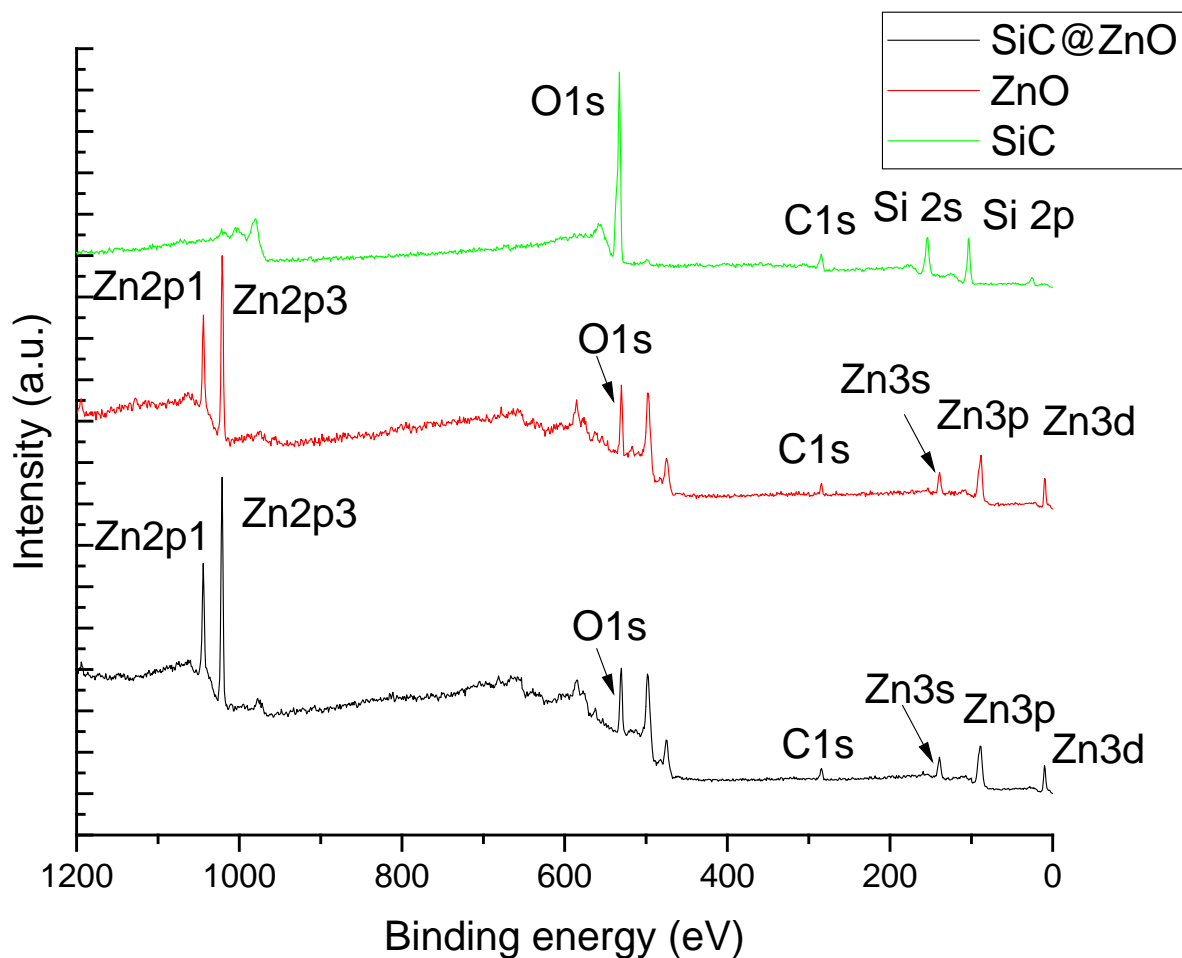

**Figure S1:** Survey X-ray photoelectron spectra of SiC, ZnO, ZnO/SiC<sub>15</sub> nanocomposite.

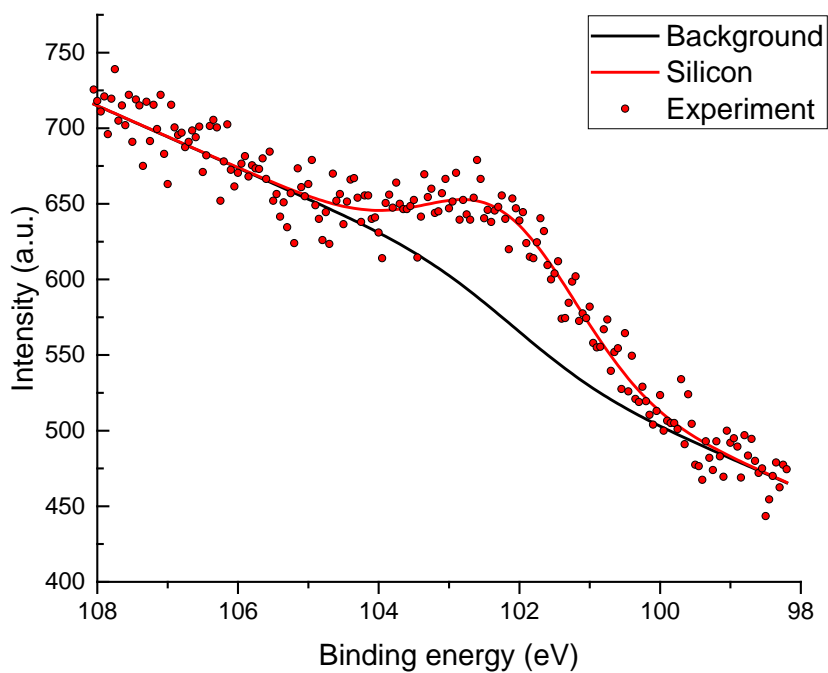

**Figure S2:** X-ray photoelectron spectra of ZnO/SiC<sub>15</sub> nanocomposite in the Si 2p region.
